# Supplementary material
Source: ML conference proceedings conference paper supplement (https://openreview.net/forum?id=Z57JrmubNl)
Supplement: supplementary_material [file attachment]

**Table 3:** Main Results with Error Bars. T@1%F represents TPR@1%FPR. We evaluate watermark accuracy in both benign and adversarial settings. Adversarial here refers to average performance over a battery of image manipulations.

| Model                                                       | Method                            | AUC/T@1%F<br>(Clean)                          | AUC/T@1%F<br>(Adversarial)                                | FID ↓                      | CLIP Score ↑                |
|-------------------------------------------------------------|-----------------------------------|-----------------------------------------------|-----------------------------------------------------------|----------------------------|-----------------------------|
| <b>Stable Diff.</b><br>FID = 25.29<br>CLIP Score<br>= 0.363 | DwtDct                            | 0.974 <sub>.001</sub> / 0.624 <sub>.013</sub> | 0.574 <sub>.005</sub> / 0.092 <sub>.004</sub>             | 25.10 <sub>.09</sub>       | 0.362 <sub>.000</sub>       |
|                                                             | DwtDctSvd                         | 1.000 <sub>.000</sub> / 1.000 <sub>.000</sub> | 0.702 <sub>.000</sub> / 0.262 <sub>.011</sub>             | 25.01 <sub>.09</sub>       | 0.359 <sub>.000</sub>       |
|                                                             | RivaGAN                           | 0.999 <sub>.000</sub> / 0.999 <sub>.000</sub> | 0.854 <sub>.002</sub> / 0.448 <sub>.006</sub>             | <b>24.51<sub>.17</sub></b> | 0.361 <sub>.000</sub>       |
|                                                             | <b><i>T-R<sub>Zeros</sub></i></b> | 0.999 <sub>.000</sub> / 0.999 <sub>.000</sub> | 0.963 <sub>.001</sub> / <b>0.715<sub>.021</sub></b>       | 26.56 <sub>.07</sub>       | 0.356 <sub>.000</sub>       |
|                                                             | <b><i>T-R<sub>Rand</sub></i></b>  | 1.000 <sub>.000</sub> / 1.000 <sub>.000</sub> | 0.918 <sub>.005</sub> / 0.702 <sub>.017</sub>             | 25.47 <sub>.05</sub>       | 0.363 <sub>.001</sub>       |
|                                                             | <b><i>T-R<sub>Rings</sub></i></b> | 1.000 <sub>.000</sub> / 1.000 <sub>.000</sub> | <b>0.975<sub>.001</sub></b> / 0.694 <sub>.018</sub>       | 25.93 <sub>.13</sub>       | <b>0.364<sub>.000</sub></b> |
| <b>ImageNet</b><br>FID = 17.73                              | DwtDct                            | 0.899 <sub>.040</sub> / 0.244 <sub>.203</sub> | 0.536 <sub>.016</sub> / 0.037 <sub>.029</sub>             | 17.77 <sub>.01</sub>       | -                           |
|                                                             | DwtDctSvd                         | 1.000 <sub>.000</sub> / 1.000 <sub>.000</sub> | 0.713 <sub>.019</sub> / 0.187 <sub>.008</sub>             | 18.55 <sub>.02</sub>       | -                           |
|                                                             | RivaGAN                           | 1.000 <sub>.000</sub> / 1.000 <sub>.000</sub> | 0.882 <sub>.010</sub> / 0.509 <sub>.009</sub>             | 18.70 <sub>.02</sub>       | -                           |
|                                                             | <b><i>T-R<sub>Zeros</sub></i></b> | 0.999 <sub>.000</sub> / 1.000 <sub>.000</sub> | 0.921 <sub>.000</sub> / 0.476 <sub>.000</sub>             | 18.78 <sub>.00</sub>       | -                           |
|                                                             | <b><i>T-R<sub>Rand</sub></i></b>  | 0.999 <sub>.000</sub> / 1.000 <sub>.000</sub> | 0.940 <sub>.004</sub> / 0.585 <sub>.006</sub>             | 18.68 <sub>.09</sub>       | -                           |
|                                                             | <b><i>T-R<sub>Rings</sub></i></b> | 0.999 <sub>.000</sub> / 0.999 <sub>.000</sub> | <b>0.966<sub>.005</sub></b> / <b>0.603<sub>.006</sub></b> | <b>17.68<sub>.16</sub></b> | -                           |

**Table 4:** AUC under each Attack for the ImageNet model, showing the effectiveness of *Tree-RingRings* over a number of augmentations. Cr. & Sc. refers to random cropping and rescaling.

| Method                            | Clean        | Rotation     | JPEG         | Cr. & Sc.    | Blurring     | Noise        | Color Jitter | Avg          |
|-----------------------------------|--------------|--------------|--------------|--------------|--------------|--------------|--------------|--------------|
| DwtDct                            | 0.899        | 0.478        | 0.522        | 0.433        | 0.512        | 0.365        | 0.538        | 0.536        |
| DwtDctSvd                         | <b>1.000</b> | 0.669        | 0.568        | 0.614        | 0.947        | 0.656        | 0.535        | 0.713        |
| RivaGan                           | <b>1.000</b> | 0.321        | <b>0.978</b> | <b>0.999</b> | 0.988        | 0.962        | 0.924        | 0.882        |
| <b><i>T-R<sub>Zeros</sub></i></b> | 0.999        | 0.953        | 0.806        | 0.997        | <b>0.999</b> | 0.938        | 0.775        | 0.921        |
| <b><i>T-R<sub>Rand</sub></i></b>  | 0.999        | 0.682        | 0.962        | 0.997        | <b>0.999</b> | <b>0.986</b> | <b>0.956</b> | 0.940        |
| <b><i>T-R<sub>Rings</sub></i></b> | 0.999        | <b>0.975</b> | 0.940        | 0.994        | <b>0.999</b> | 0.979        | 0.861        | <b>0.966</b> |

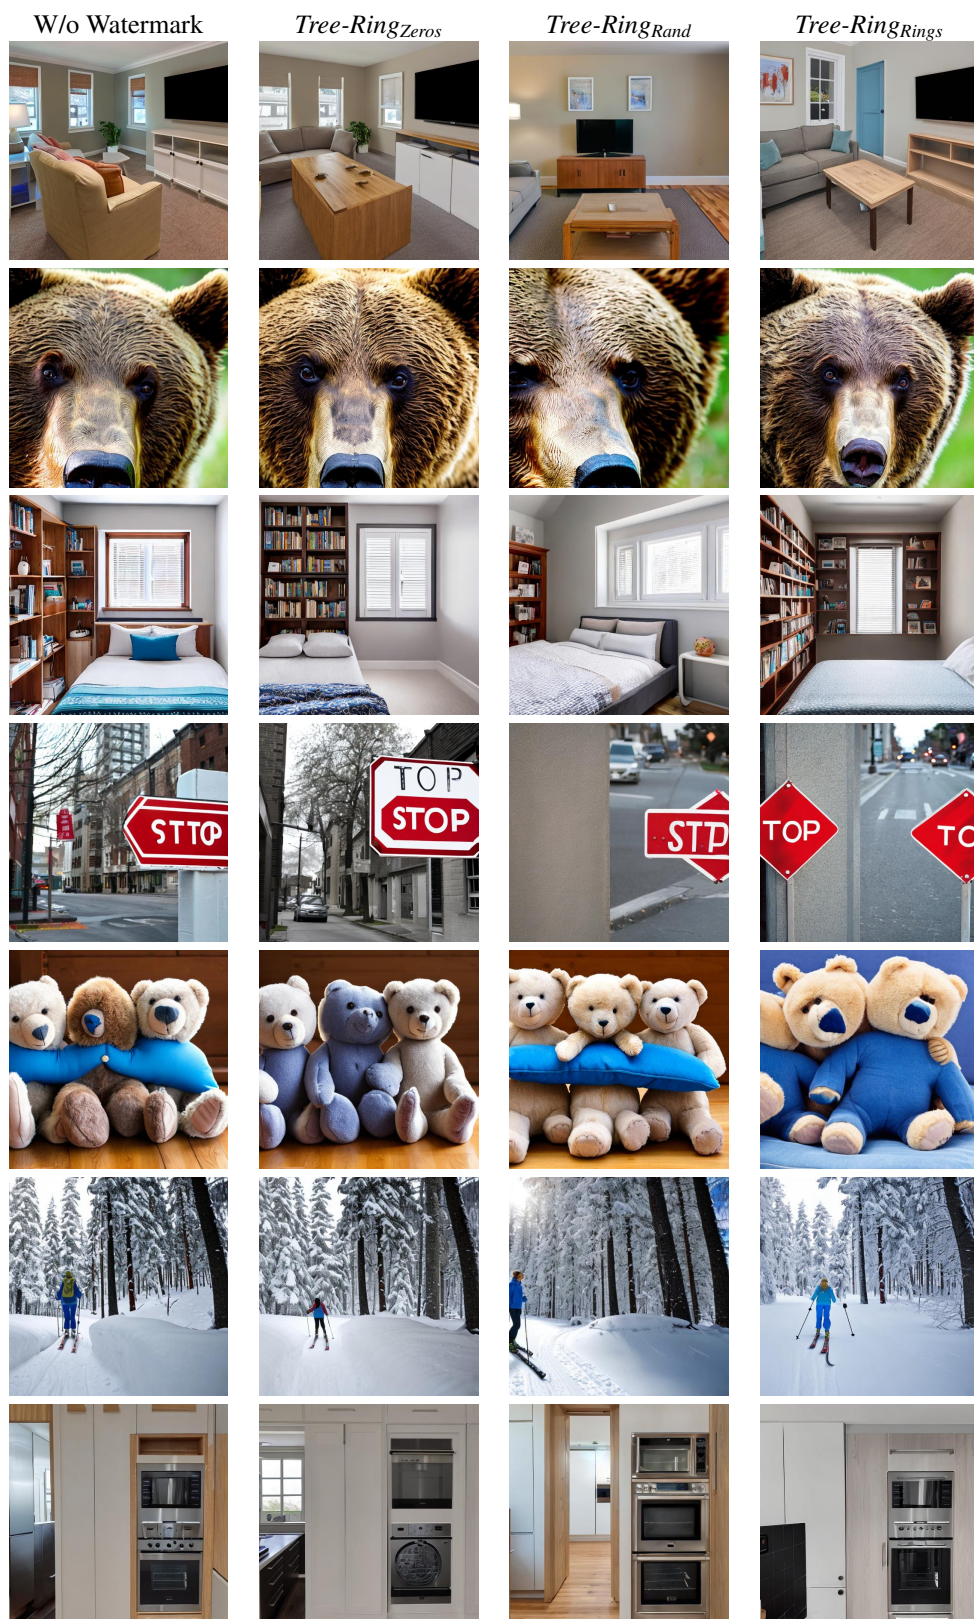

**Figure 6:** More generated images with *Tree-Ring Watermarking* with the first 7 prompts in MS-COCO-2017 training dataset.

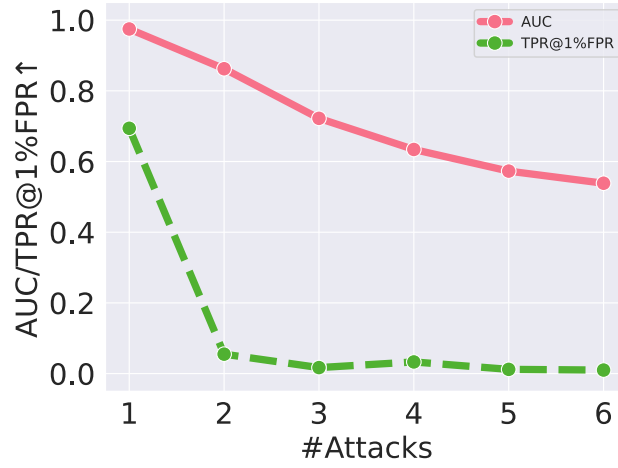

**Figure 7:** Results on  $k$  number of random attacks applied at the same time.

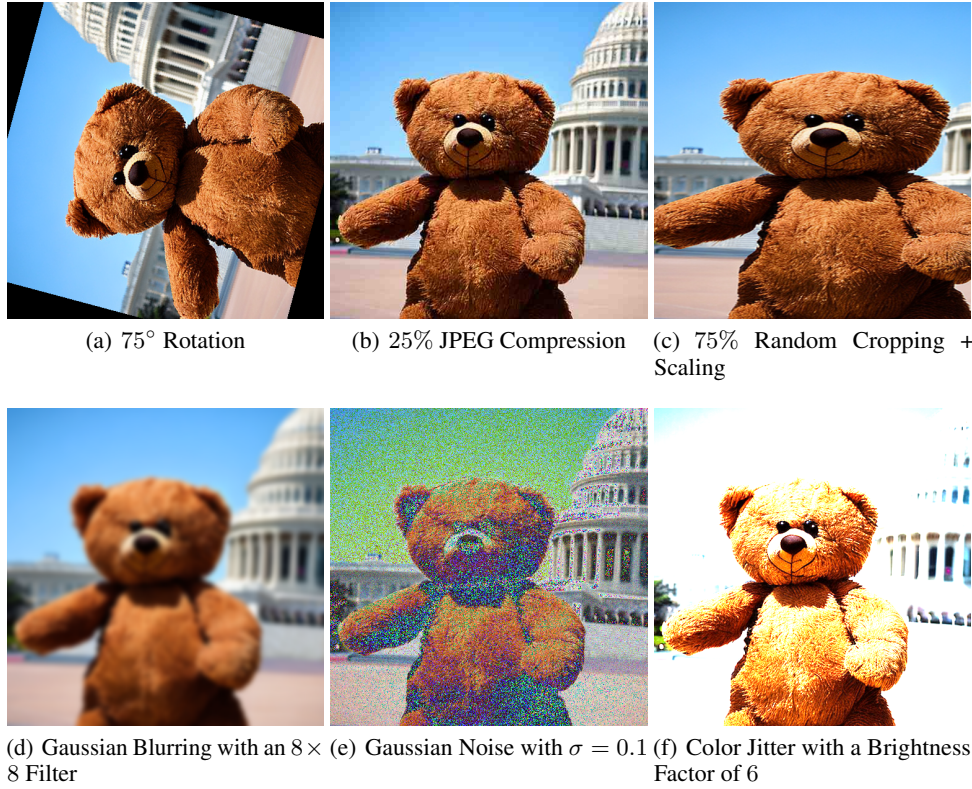

**Figure 8:** Attacked images.
